# Supplementary material
Source: PubMed Central journal article supplement (PMC6506890)
Supplement: jamadermatol-155-548-s001.pdf [file jamadermatol-155-548-s001.pdf]

## Supplementary Online Content

Atzmony L, Khan HM, Lim YH, et al. Association of Second-Hit, Postzygotic *PMVK* and *MVD* Mutations With Linear Porokeratosis. *JAMA Dermatol*. Published online April 3, 2019. doi: 10.1001/jamadermatol.2019.0016

**eTable 1.** Primers List

**eTable 2.** Exome sequencing statistics

**eFigure 1.** There is no evidence for somatic LOH in participants 2 and 3

**eFigure 2.** Expression of wild type *MVD* transcript is significantly reduced in human keratinocytes with heterozygous *MVD* c.70+5G>A mutation suggesting that *MVD* c.70+5G>A transcript undergoes degradation

**eFigure 3.** Restriction fragment length polymorphism (RFLP) analysis confirms *MVD* c.811\_815del p.F271fs in affected skin of participant 3

This supplementary material has been provided by the authors to give readers additional information about their work.

**eTable 1. Primers list.**

| <b>Name</b>    | <b>Sequence (5'-3')</b>   | <b>Use</b>                                         |
|----------------|---------------------------|----------------------------------------------------|
| PMVK exon 1-F  | ATTCCGCGCGGTGTCC          | PCR and Sanger sequencing                          |
| PMVK exon1-R   | GTGACACCCAAAAGCACTCCTC    | PCR and Sanger sequencing                          |
| PMVK exon4-F   | GTGAGTCTAGCTGCTGACATGC    | PCR and Sanger sequencing                          |
| PMVK exon4-R   | ATCAGGAGGCCTCAGATTCTCC    | PCR and Sanger sequencing                          |
| MVD intron1-F  | GCGGACCTACGTCAGCAACC      | PCR and Sanger sequencing                          |
| MVD intron1-R  | GAGCTTGTACGCGAAGGAG       | PCR and Sanger sequencing                          |
| MVD exon7-F    | CGCCAAGACCACGTGCAG        | PCR                                                |
| MVD exon7-R    | ACAGCAGGGTGGAGCTTTCAGACAC | PCR                                                |
| PMVK-F         | TGTGGTTTGTCTACCGGGC       | qPCR                                               |
| PMVK-R         | AGGAGGCCTCAGATTCTCCTT     | qPCR                                               |
| ACTB-F         | CTCATGGCCTTGTACACGA       | qPCR                                               |
| ACTB-R         | TGAGCTCTTTTTCTGGTGTGTTGTC | qPCR                                               |
| MVDc exon1-5-F | TTGTACAGCGCCGGTCAAC       | Selective cDNA amplification and Sanger sequencing |
| MVDc exon1-5-R | GGTGTAGGCTAGGCAGGCATAG    | Selective cDNA amplification and Sanger sequencing |
| MVDc-F         | AACATCGCGGTCATCAAGTA      | qRT-PCR                                            |
| MVDc-R         | AACTGGTCCTGGTGCAGAGT      | qRT-PCR                                            |
| ACTBc-F        | GATCATTGCTCCTCCTGAGC      | qRT-PCR                                            |
| ACTBc-R        | ACATCTGCTGGAAGGTGGAC      | qRT-PCR                                            |

**eTable 2. Exome sequencing statistics.**

| <b>Sample</b>                 | <b>Mean coverage</b> | <b>Bases covered &gt;15x</b> | <b>Mean read length</b> |
|-------------------------------|----------------------|------------------------------|-------------------------|
| Participant 1-blood           | 45.5                 | 94.3%                        | 99 bases                |
| Participant 1-tissue          | 133.6                | 98.8%                        | 99 bases                |
| Participant 2-blood           | 38.6                 | 89.8%                        | 99 bases                |
| Participant 2-tissue          | 139.9                | 98.6%                        | 99 bases                |
| Participant 3-blood           | 37.7                 | 90.7%                        | 99 bases                |
| Participant 3-tissue          | 82.7                 | 92.7%                        | 99 bases                |
| Participant 3's mother- blood | 29.39                | 81.9%                        | 99 bases                |

**eFigure 1. There is no evidence for somatic LOH in participants 2 and 3.**

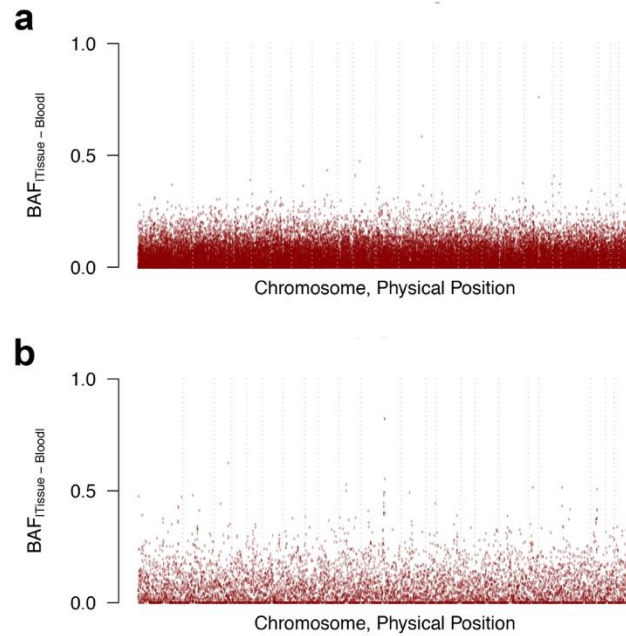

B- allele frequency differences between affected tissue and blood are plotted across the genome for participant 2 (a) and participant 3 (b) by chromosome and physical position. Dashed vertical lines separate individual chromosomes.

**eFigure 2: Expression of wild type *MVD* transcript is significantly reduced in human keratinocytes with heterozygous *MVD* c.70+5G>A mutation suggesting that *MVD* c.70+5G>A transcript undergoes degradation.**

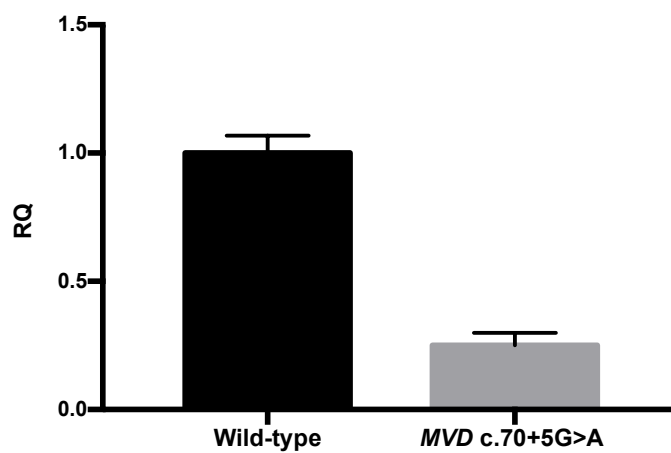

Comparative qRT-PCR was employed to assess the expression of wild-type *MVD* transcript in heterozygous *MVD* c.70+5G>A mutated human keratinocytes. Wild-type human keratinocytes were used as a reference sample. The fold change in the expression level of wild-type *MVD* transcript from mutated keratinocytes is calculated using relative quantification (RQ). RQ= 0.25, p<0.001.

**eFigure 3: Restriction fragment length polymorphism (RFLP) analysis confirms *MVD* c.811\_815del p.F271fs in affected skin of participant 3.**

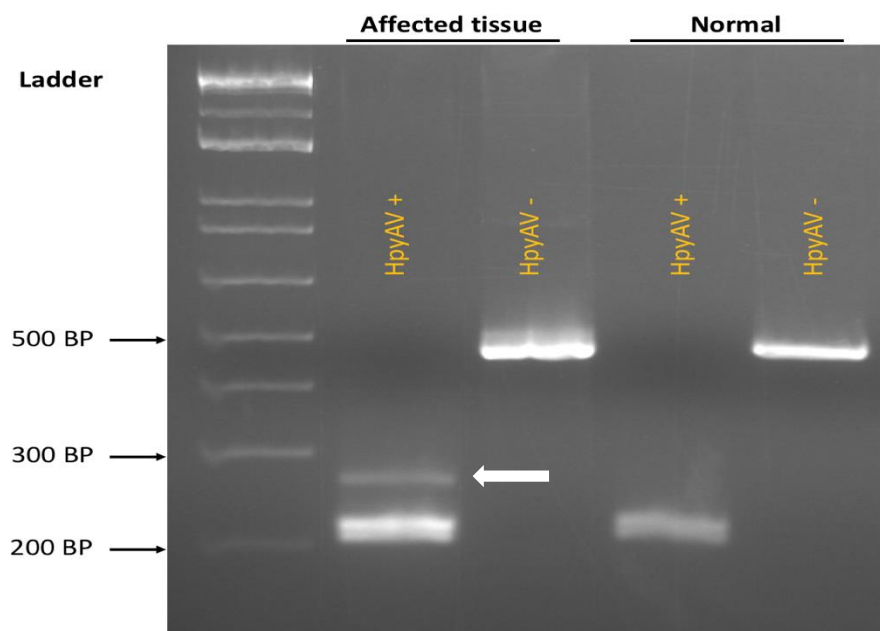

Agarose gel electrophoresis of digested and undigested PCR amplicons of affected tissue (473 bp) and normal (478 bp) of participant 3. Digestion with HpyAV of mutated amplicon showing specific band of 254 bp length that is absent in normal tissue.
